# Supplementary material for: Clinical and functional analyses of AIPL1 variants reveal mechanisms of pathogenicity linked to different forms of retinal degeneration
Source: PubMed Central journal article supplement (PMC7567831; doi:10.1038/s41598-020-74516-9), 2020-10-16

## Supplementary data

### **Clinical and functional analyses of *AIP1* variants reveal mechanisms of pathogenicity linked to different forms of retinal degeneration**

**Almudena Sacristan-Reviriego<sup>1</sup>, Hoang Mai Le<sup>1</sup>, Michalis Georgiou<sup>1,2</sup>, Isabelle Meunier<sup>3</sup>,  
Beatrice Bocquet<sup>3</sup>, Anne-Françoise Roux<sup>4</sup>, Chrisostomos Prodromou<sup>5</sup>, James Bainbridge<sup>1,2</sup>,  
Michel Michaelides<sup>1,2</sup> and Jacqueline van der Spuy<sup>1\*</sup>**

<sup>1</sup>UCL Institute of Ophthalmology, University College London, 11 – 43 Bath Street, London, EC1V 9EL, UK

<sup>2</sup>Moorfields Eye Hospital, City Road, London, EC1V 2PD, UK

<sup>3</sup>Centre National de Référence Maladies Sensorielles Génétiques. Service Ophtalmologie Hôpital Gui de Chauliac - CHRU de Montpellier. 80 rue Augustin Fliche – 34295 Montpellier, France

<sup>4</sup>Laboratoire de Génétique Moléculaire, CHU de Montpellier, Université de Montpellier, Montpellier, France.

<sup>5</sup>Biochemistry and Biomedicine, University of Sussex, Brighton, Falmer, BN1 9QG, UK

\*Corresponding author: [j.spuy@ucl.ac.uk](mailto:j.spuy@ucl.ac.uk)

**Supplementary Table 1: Clinical information of patients with *A1PL1* variations**

| Case                                                                    | Allele 1                 | Allele 2                 | Visual Acuity<br>R - L | OCT                                                                                                                       | Posterior Pole Findings                                                                                                                                                             | ERG                                                                                                                     | Clinical Diagnosis                     | Reference  |
|-------------------------------------------------------------------------|--------------------------|--------------------------|------------------------|---------------------------------------------------------------------------------------------------------------------------|-------------------------------------------------------------------------------------------------------------------------------------------------------------------------------------|-------------------------------------------------------------------------------------------------------------------------|----------------------------------------|------------|
| <b>Patients with <i>A1PL1</i> variations identified on both alleles</b> |                          |                          |                        |                                                                                                                           |                                                                                                                                                                                     |                                                                                                                         |                                        |            |
| <b>P1</b>                                                               | c.116C>A; <b>p.T39N</b>  | c.116C>A; <b>p.T39N</b>  | N/A                    | N/A                                                                                                                       | Macular degeneration, diffuse pigmentary retinopathy                                                                                                                                | N/A                                                                                                                     | LCA                                    | 46         |
| <b>P2</b>                                                               | c.214T>C; <b>p.W72R</b>  | c.265T>C; p.C89R         | PL - PL                | Abnormal lamination, foveal depression, reduced foveal retinal thickness, foveal ONL barely discernible or not detectable | N/A                                                                                                                                                                                 | Undetectable                                                                                                            | LCA                                    | 25         |
| <b>P3</b>                                                               | c.266G>A; <b>p.C89Y</b>  | c.266G>A; <b>p.C89Y</b>  | N/A                    | N/A                                                                                                                       | N/A                                                                                                                                                                                 | Markedly diminished                                                                                                     | LCA                                    | 47         |
| <b>P4</b>                                                               | c.364G>A; <b>p.G122R</b> | c.834G>A; p.W278X        | HM - HM                | N/A                                                                                                                       | Macular dystrophy                                                                                                                                                                   | Undetectable                                                                                                            | LCA                                    | 32         |
| <b>P5</b>                                                               | c.364G>A; <b>p.G122R</b> | c.364G>A; <b>p.G122R</b> | 20/50 – 20/100         | N/A                                                                                                                       | N/A                                                                                                                                                                                 | Discernible rod and cone responses                                                                                      | RP                                     | This study |
| <b>P6</b>                                                               | c.364G>C; <b>p.G122R</b> | c.834G>A; p.W278X        | 20/60 - 20/400         | Deep foveal depression, loss of foveal ONL, signs of retinal remodeling in the macular region                             | Bull's-eye – like lesion in the foveal region, pigmentary retinal degeneration with atrophy extending from the arcades into the midperipheral retina and attenuated retinal vessels | Undetectable                                                                                                            | RP/<br>Late onset retinal degeneration | 25         |
| <b>P7</b>                                                               | c.364G>C; <b>p.G122R</b> | c.834G>A; p.W278X        | 20/20 - 20/20          | Extensive loss of the photoreceptor-RPE complex and the EZ, EZ and IZ are only visible in the foveal zone                 | N/A                                                                                                                                                                                 | Dark-adapted and light adapted full-field ERG responses are reduced within 50% and 25% respectively of the normal range | Mild RP                                | This study |
| <b>P8</b>                                                               | c.364G>C; <b>p.G122R</b> | c.834G>A; p.W278X        | 20/20 - 20/20          | The photoreceptor-RPE complex and the EZ are only visible in the foveal zone                                              | N/A                                                                                                                                                                                 | N/A                                                                                                                     | Mild RP                                | This study |

|             |                                                                |                                                                |                   |                                      |                                                                                                                                  |                                                                                                              |              |                  |
|-------------|----------------------------------------------------------------|----------------------------------------------------------------|-------------------|--------------------------------------|----------------------------------------------------------------------------------------------------------------------------------|--------------------------------------------------------------------------------------------------------------|--------------|------------------|
| <b>P9</b>   | c.582C>G; <b>p.Y194X</b>                                       | c.834G>A; p.W278X                                              | PL - PL           | N/A                                  | Pigmentary changes                                                                                                               | N/A                                                                                                          | LCA          | 48               |
| <b>P10*</b> | c.666G>A; <b>p.W222X*</b>                                      | c.834G>A; p.W278X                                              | HM/30cm - HM/30cm | Loss of outer retinal structure      | N/A                                                                                                                              | N/A                                                                                                          | LCA          | This study       |
| <b>P11</b>  | c.733G>T; <b>p.E245X</b>                                       | c.834G>A; p.W278X                                              | 6/240 - 6/240     | N/A                                  | Pigmentary changes                                                                                                               | N/A                                                                                                          | LCA          | 48               |
| <b>P12</b>  | c.809G>A; <b>p.R270H</b>                                       | c.834G>A; p.W278X                                              | HM - HM           | N/A                                  | Macular atrophy                                                                                                                  | Undetectable                                                                                                 | LCA          | 49               |
| <b>P13</b>  | c.809G>A; <b>p.R270H</b>                                       | c.834G>A; p.W278X                                              | 20/1200 – 20/1000 | 101/111, PSJ not preserved           | Macular dystrophy                                                                                                                | Undetectable                                                                                                 | LCA          | 32               |
| <b>P14</b>  | c.809G>A; <b>p.R270H</b>                                       | c.834G>A; p.W278X                                              | N/A               | N/A                                  | N/A                                                                                                                              | Markedly diminished                                                                                          | LCA          | 47               |
| <b>P15</b>  | c.926_927ins<br>CCTGAACCGCAGGGAGCT;<br><b>p.E309DinsLNRREL</b> | c.926_927ins<br>CCTGAACCGCAGGGAGCT;<br><b>p.E309DinsLNRREL</b> | HM/50cm - HM/45cm | N/A                                  | Attenuated vessels, carpet like retinal degeneration                                                                             | Undetectable                                                                                                 | LCA          | 36               |
| <b>P16</b>  | c.1126C>T; <b>p.P376S</b>                                      | c.341C>T; p.T114I                                              | N/A               | N/A                                  | N/A                                                                                                                              | N/A                                                                                                          | LCA          | 26               |
| <b>P17</b>  | c.1126C>T; <b>p.P376S</b>                                      | c.341C>T; p.T114I                                              | 20/400            | N/A                                  | Peripheral retinal mottling, severe maculopathy, moderate pigmentary retinopathy                                                 | N/A                                                                                                          | LCA          | 23               |
| <b>P18</b>  | c.1126C>T; <b>p.P376S</b>                                      | c.341C>T; p.T114I                                              | N/A               | N/A                                  | Severe pigmentary retinopathy                                                                                                    | N/A                                                                                                          | LCA          | 23               |
| <b>P19</b>  | c.1126C>T; <b>p.P376S</b>                                      | c.341C>T; p.T114I                                              | N/A               | N/A                                  | N/A                                                                                                                              | N/A                                                                                                          | EOSRD<br>LCA | 50               |
| <b>P20</b>  | c.1126C>T; <b>p.P376S</b>                                      | c.341C>T; p.T114I                                              | 6/19 - 6/48       | Reduced retinal and foveal thickness | Moderate pigmentary changes. Bone spicule retinopathy, no obvious macular atrophy but some pigmentary changes seen in the macula | Full field and rod ERG responses reduced in R and L, subnormal and delayed cone 30 Hz flicker ERG in R and L | ESORD        | 35<br>This study |
| <b>P21</b>  | c.1126C>T; <b>p.P376S</b>                                      | c.1126C>T; <b>p.P376S</b>                                      | 6/60 - PL         | N/A                                  | Pigmentary retinopathy with severe clumping, severe macular atrophy                                                              | Reduced responses in R, undetectable in L                                                                    | EOSRD        | 35<br>This study |

Supplementary Table 1: Clinical information of patients (unrelated probands) with *AIPL1* variations - Continue

| Case                                                                          | Allele 1                                                                                      | Allele 2 | Visual Acuity<br>R - L | OCT | Posterior Pole Findings                                                                                                                  | ERG                                                                                 | Clinical<br>Diagnosis  | Reference        |
|-------------------------------------------------------------------------------|-----------------------------------------------------------------------------------------------|----------|------------------------|-----|------------------------------------------------------------------------------------------------------------------------------------------|-------------------------------------------------------------------------------------|------------------------|------------------|
| <b>Patients with a single <i>AIPL1</i> variation identified on one allele</b> |                                                                                               |          |                        |     |                                                                                                                                          |                                                                                     |                        |                  |
| <b>P22</b>                                                                    | c.157C>T; <b>p.R53W</b>                                                                       | N/A      | N/A                    | N/A | N/A                                                                                                                                      | N/A                                                                                 | LCA                    | 51               |
| <b>P23</b>                                                                    | c.214T>C; <b>p.W72R</b>                                                                       | N/A      | N/A                    | N/A | N/A                                                                                                                                      | N/A                                                                                 | LCA                    | 33               |
| <b>P24</b>                                                                    | c.390C>A; <b>p.H130Q</b>                                                                      | N/A      | N/A                    | N/A | N/A                                                                                                                                      | N/A                                                                                 | EOSRD<br>LCA           | 35               |
| <b>P25</b>                                                                    | c.593C>T; <b>p.S198F</b>                                                                      | N/A      | N/A                    | N/A | N/A                                                                                                                                      | N/A                                                                                 | EOSRD<br>LCA           | 35               |
| <b>P26</b>                                                                    | c.617T>A; <b>p.I206N</b>                                                                      | N/A      | N/A                    | N/A | N/A                                                                                                                                      | N/A                                                                                 | LCA                    | 51               |
| <b>P27</b>                                                                    | c.878T>C; <b>p.L293P</b>                                                                      | N/A      | N/A                    | N/A | N/A                                                                                                                                      | N/A                                                                                 | LCA                    | 33               |
| <b>P28</b>                                                                    | c.894G>C; <b>p.Q298H</b>                                                                      | N/A      | N/A                    | N/A | N/A                                                                                                                                      | N/A                                                                                 | EOSRD<br>LCA           | 35               |
| <b>P29</b>                                                                    | c.1053_1064del<br>TGCAGAGCCACC; <b>p.A352_P355del</b>                                         | N/A      | N/A                    | N/A | N/A                                                                                                                                      | N/A                                                                                 | adCORD,<br>juvenile RP | 26               |
| <b>P30</b>                                                                    | c.1091C>G; <b>p.A364G</b>                                                                     | N/A      | N/A                    | N/A | N/A                                                                                                                                      | N/A                                                                                 | EOSRD<br>LCA           | 35               |
| <b>P31</b>                                                                    | c.1097C>G; <b>p.P366R</b>                                                                     | N/A      | N/A                    | N/A | N/A                                                                                                                                      | N/A                                                                                 | EOSRD<br>LCA           | 35               |
| <b>P32</b>                                                                    | c.1103_1114dup; <b>p.E369_T372dup</b>                                                         | N/A      | N/A                    | N/A | N/A                                                                                                                                      | N/A                                                                                 | LCA                    | 33               |
| <b>P33</b>                                                                    | c.1111_1122dup; <b>p.A371_P374dup</b>                                                         | N/A      | 20/200<br>(better eye) | N/A | Primarily peripapillary hypopigmentation with patchy pigment clumping as well as drusen like deposits and macular hypopigmentary changes | Undetectable/<br>Severely reduced                                                   | LCA                    | 52               |
| <b>P34</b>                                                                    | c.1126C>T; <b>p.P376S</b>                                                                     | N/A      | N/A                    | N/A | N/A                                                                                                                                      | N/A                                                                                 | LCA†                   | 33               |
| <b>P35</b>                                                                    | c.1126C>T; <b>p.P376S</b><br>c.341C>T; p.T114I<br><i>Cis</i> -allelic inheritance from mother | N/A      | N/A                    | N/A | N/A                                                                                                                                      | N/A                                                                                 | LCA                    | 34               |
| <b>P36</b>                                                                    | c.1126C>T; <b>p.P376S</b>                                                                     | N/A      | 6/30 – 6/38            | N/A | Moderate pigmentary changes, clumping<br>Macular pigmentation and atrophy                                                                | Absent rod and cone ERG responses, delayed 30 Hz flicker cone ERG of low amplitude. | EOSRD                  | 35<br>This study |
| <b>P37</b>                                                                    | c.1126C>T; <b>p.P376S</b>                                                                     | N/A      | 3/60 - 3/60            | N/A | Severe pigmentary retinopathy, no maculopathy                                                                                            | Reduced in R and L                                                                  | RP<br>EOSRD            | 35<br>This study |

R, right eye; L, left eye; HM, hand motion; PL, perception of light; RPE, retinal pigment epithelium; LCA, Leber congenital amaurosis; EOSRD, early-onset severe retinal dystrophy; RP, retinitis pigmentosa; adCORD; autosomal dominant cone-rod dystrophy; ONL, outer nuclear layer; N/A, not available; \*, novel variation; †, did not segregate with disease. The *AIPL1* variants investigated in this study are shown in **BOLD**.

## Supplementary Figures

### Figure Legends:

**Supplementary Figure 1:** (A) Full-field ERG from a 34-year-old man with a retinitis pigmentosa phenotype carrying a homozygous *AIPL1* p.G122R variant. Dark-adapted (rod responses) and light-adapted (cone responses) are reduced within 20% of the normal range. (B) Full-field ERG from an 18-year-old woman with a retinitis pigmentosa phenotype with *AIPL1* c.364G>C, p.G122R/c.834G>A, p.W278X variants. Dark-adapted (rod responses) are reduced within 50% and light-adapted (cone responses) within 25% of the normal range.

**Supplementary Figure 2: Longitudinal infrared and autofluorescence imaging of the brother of the woman of the figure 2.** (A-D) First examination at the age of 7 with nyctalopia noted at the age of 6. Visual acuity is 20/20 in both eyes. On infrared reflectance imaging, the vessels are preserved (A 30° field of view, C 50° field of view). On FAF imaging (B, D), there is a change of the autofluorescence of the macula and the nasal part of the optic nerve head with a hyperautofluorescence pattern in both eyes (white arrows). (E-J) Multimodal imaging of the brother at the age of 14: (E, G) infrared reflectance imaging, (F, H) FAF imaging, (I, J), SD OCT imaging. Visual acuity is 20/20. FAF imaging (F and H) discloses a macular hyperautofluorescent ring in both eyes. On SD-OCT (I and J), the PR+RPE complex and the EZ are only visible in the foveal zone (between blue arrows) in accordance with the visual acuity of 20/20.

**Supplementary Figure 3: Full blots: Expression of AIPL1 variants.** Western blotting analysis (different exposures) of wild-type (w/t) AIPL1 and the indicated AIPL1 variants. The proteins were resolved by SDS-PAGE on a 12% gel. (A) The anti-myc antibody recognizes the myc tag fused to the N-terminus of AIPL1. (B) The anti-AIPL1 antibody is directed against a C-terminal AIPL1 epitope [32]. GAPDH was detected as a loading control. \* demarcates an *in silico* designed AIPL1 variant not found in patients and not associated with disease. (C) Relative quantitation of AIPL1 levels with the anti-myc antibody (upper panel) and the anti-AIPL1 antibody (lower panel).

# Supplementary Figure 1

## A Full field dark-adapted 0.01 ERG

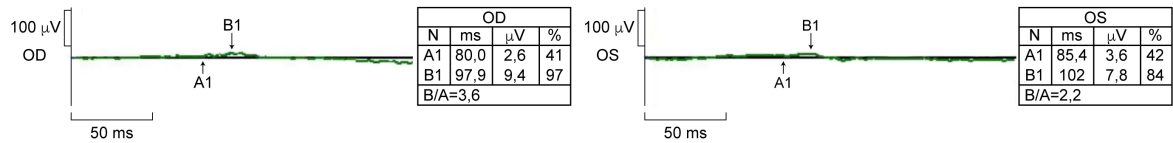

## Full field dark-adapted 3.0 ERG

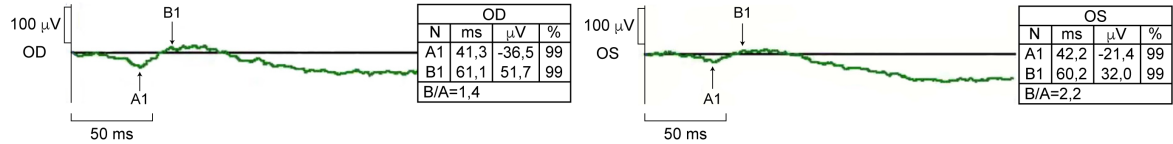

## Full field light-adapted 3.0 ERG

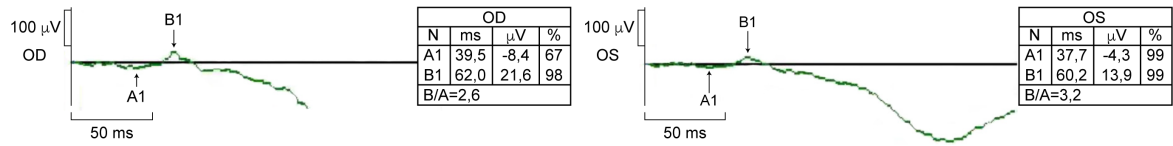

## Full field light-adapted 3.0 flicker

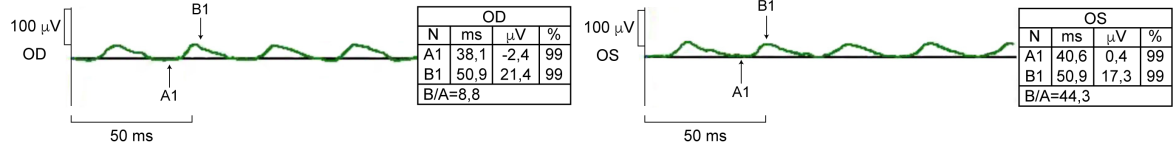

## B

### Full field dark-adapted BSCOT ERG

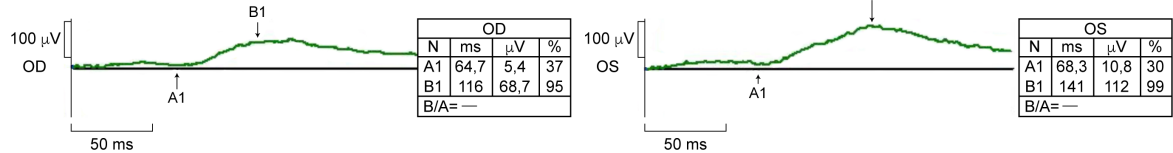

### Full field dark-adapted 3.0 ERG

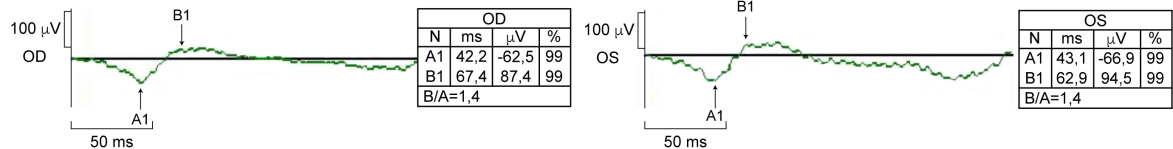

### Full field light-adapted 3.0 ERG

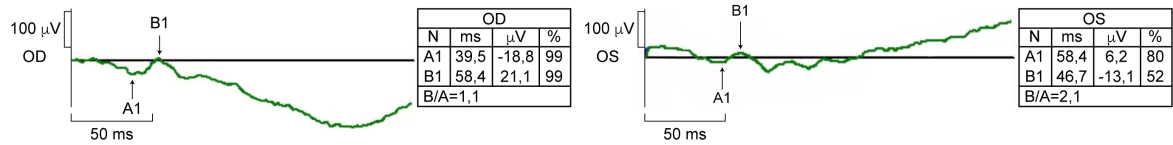

### Full field light-adapted 3.0 flicker

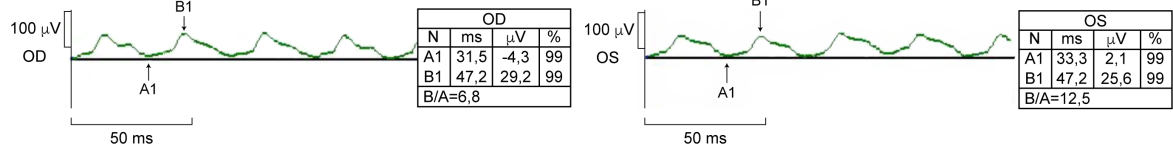

Supplementary Figure 2

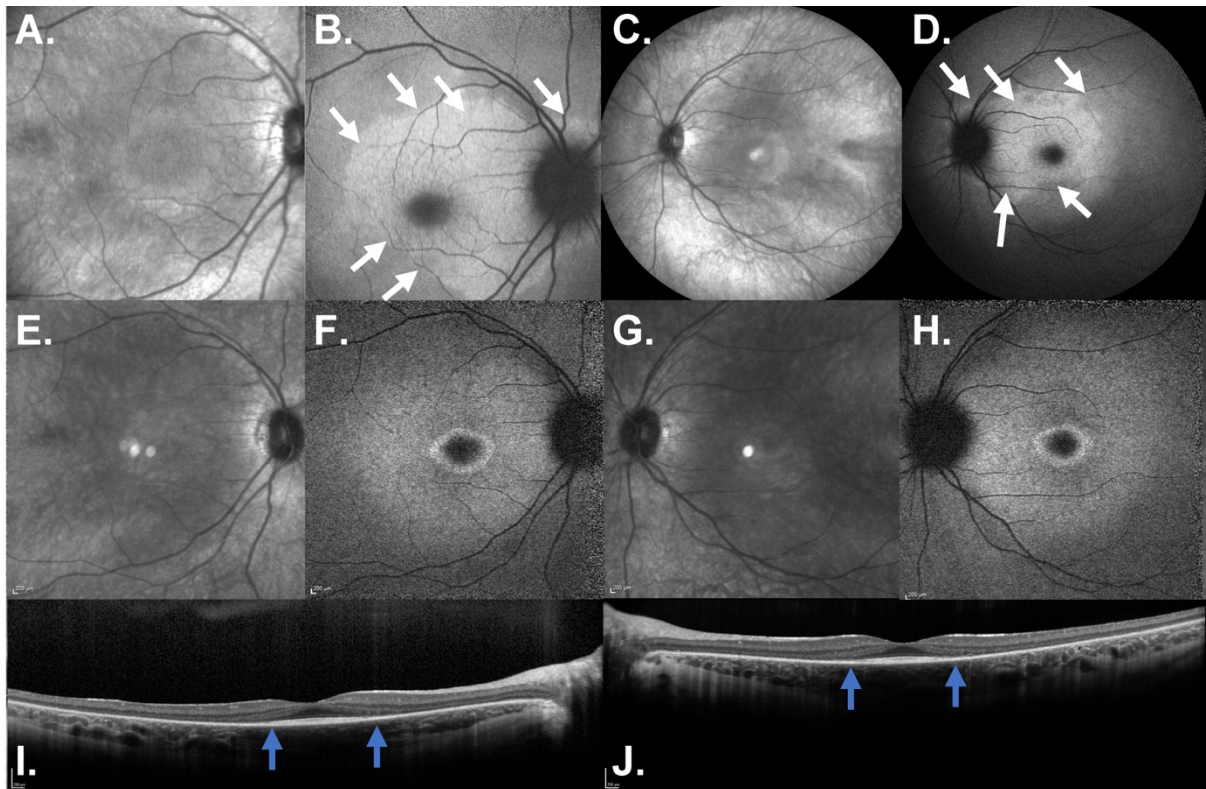

Supplementary Figure 3:

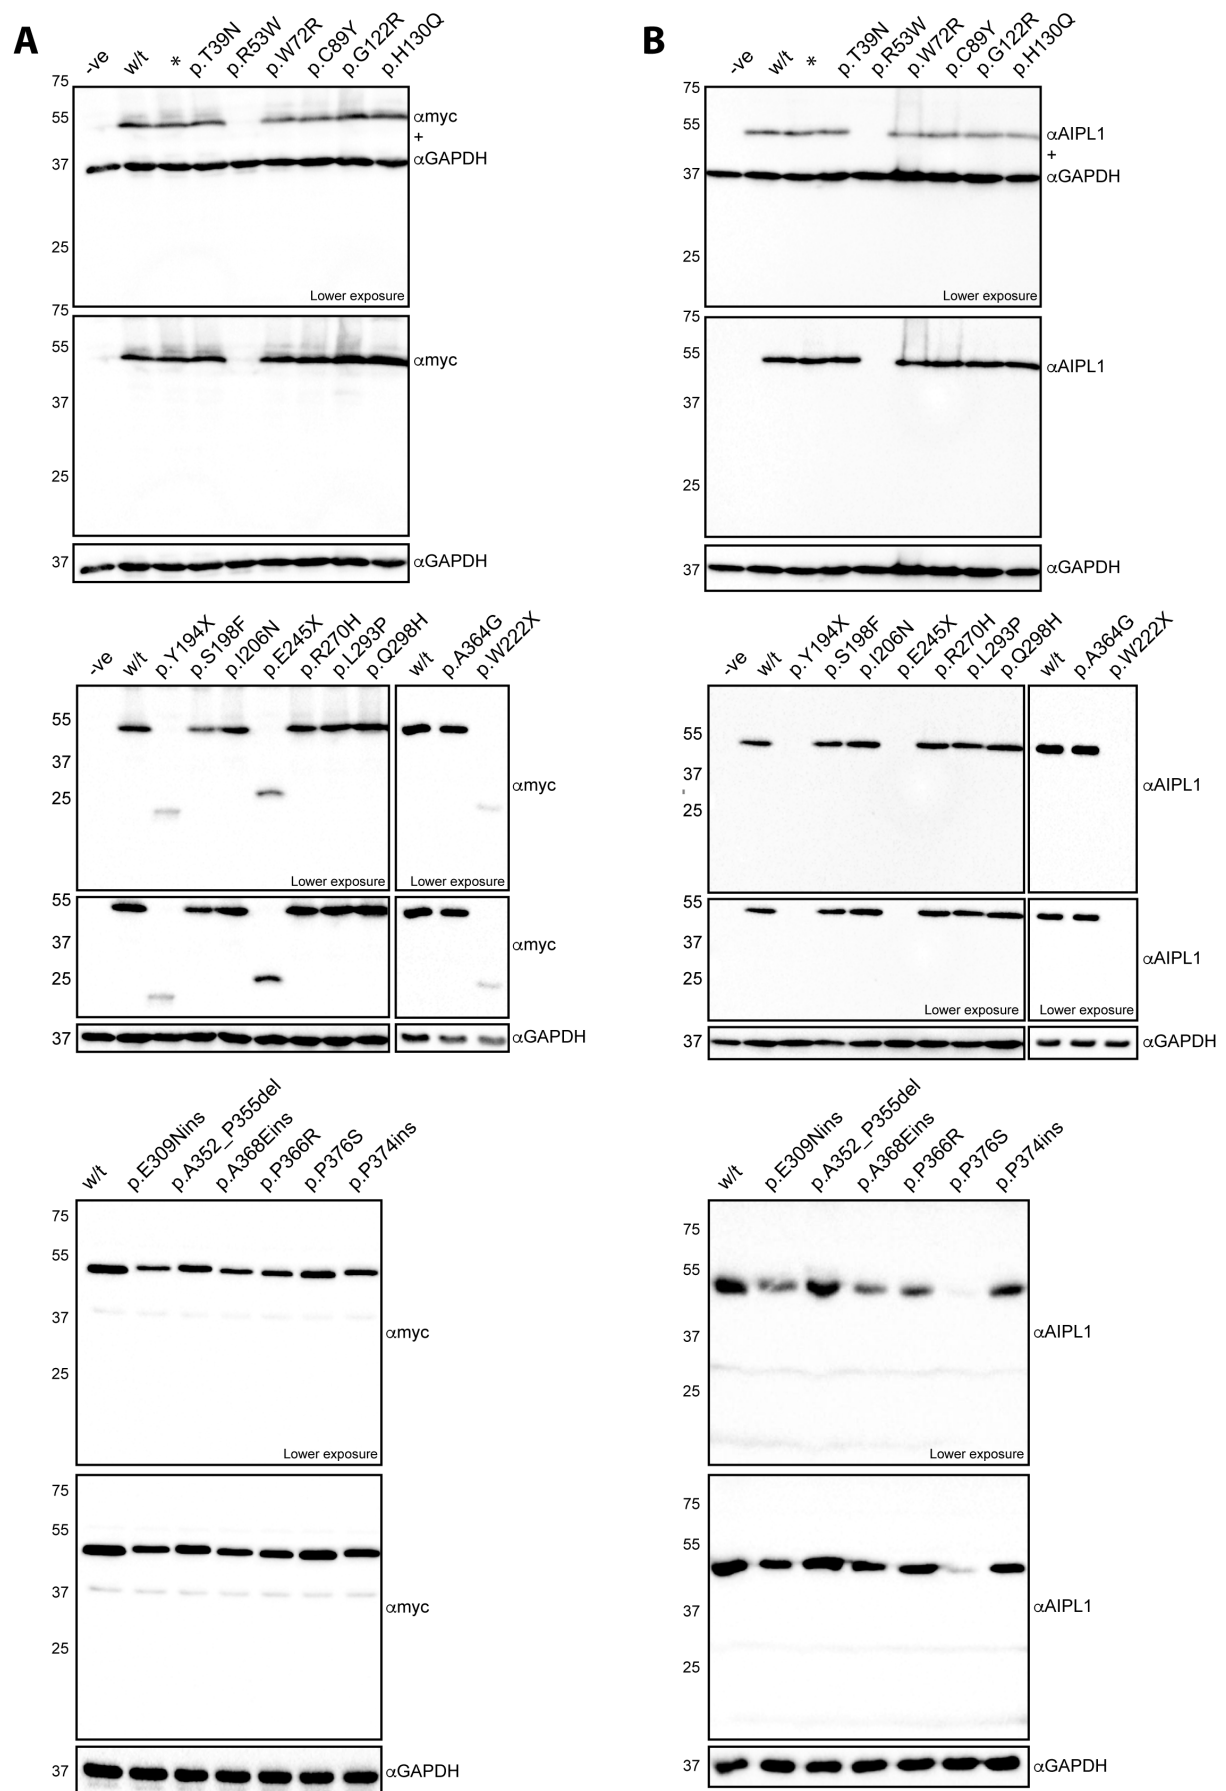



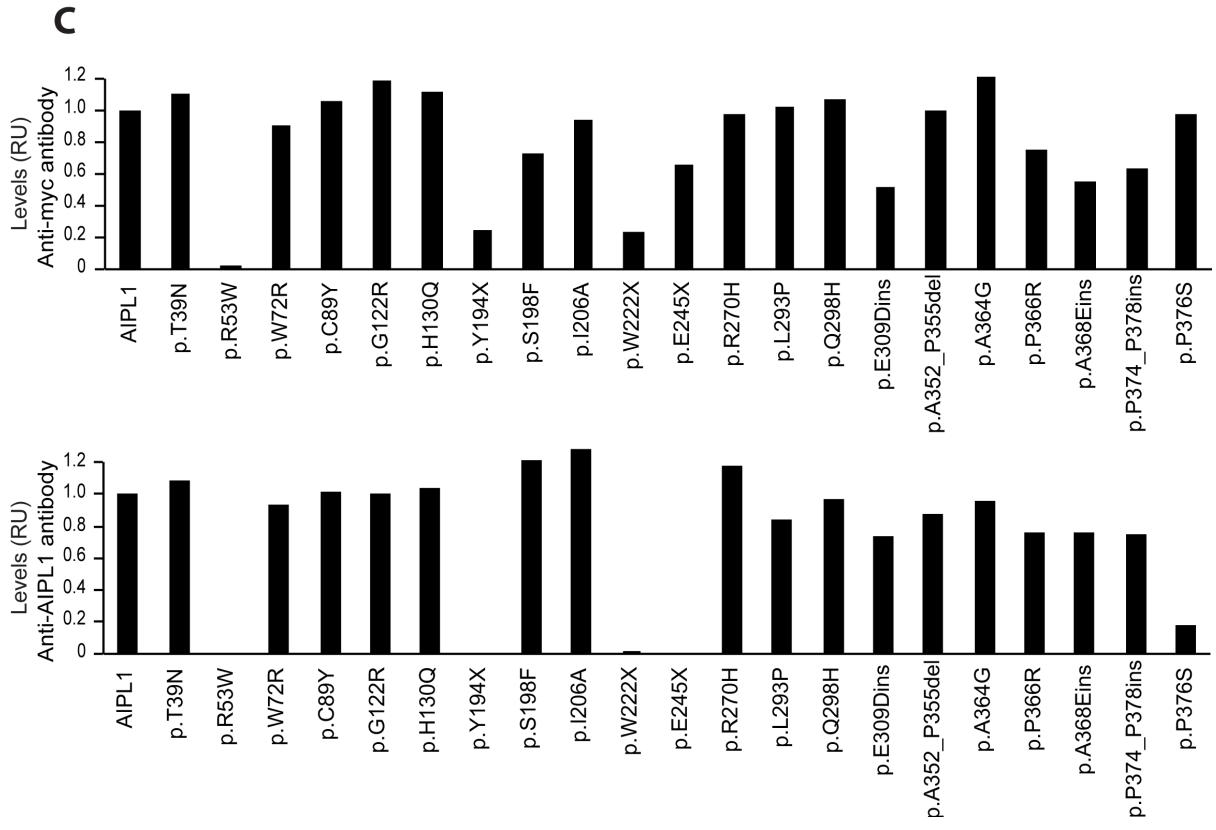

Supplement: 41598_2020_74516_MOESM1_ESM.pdf [file 41598_2020_74516_MOESM1_ESM.pdf]
